# Supplementary material for: Effects of Different Doses, Forms, and Frequencies of Zinc Supplementation on Biomarkers of Iron and Zinc Status among Young Children in Dhaka, Bangladesh
Source: MDPI journal article supplement (doi:10.3390/nu14245334), 2022-12-15
Supplement: s1 [file s1]

**Table S1.** Characteristics of the study interventions

| Study Group            | Form               | Micronutrient Content                                                                                                                                                                                                                                                                                                                                                                                                                                                                                                                                                                                          | Frequency of consumption                                                     |
|------------------------|--------------------|----------------------------------------------------------------------------------------------------------------------------------------------------------------------------------------------------------------------------------------------------------------------------------------------------------------------------------------------------------------------------------------------------------------------------------------------------------------------------------------------------------------------------------------------------------------------------------------------------------------|------------------------------------------------------------------------------|
| Standard MNP           | Powder             | Vitamin A (as Vitamin A acetate): 400 µg<br>Vitamin D (as Cholecalciferol): 5 µg<br>Vitamin E (as dl-alpha-tocopheryl acetate): 5 mg<br>Vitamin C (as Ascorbic acid): 30 mg<br>Thiamine (as Thiamin mononitrate): 0.5 mg<br>Riboflavin: 0.5 mg<br>Niacin (as Niacinamide): 6 mg<br>Vitamin B6 (as Pyridoxine hydrochloride): 0.5 mg<br>Vitamin B12 (as Cyanocobalamin): 0.9 mg<br>Folic acid: 150 µg<br>Iron (as Ferrous fumarate): 10 mg<br>Zinc (as Zinc gluconate): 4.1 mg<br>Copper (as Copper sulfate, anhydrous): 0.56 mg<br>Selenium (as Sodium selenite): 17 µg<br>Iodine (as Potassium iodate): 90 µg | Daily for 24 weeks                                                           |
| HiZn LoFe Daily        | Powder             | Same as Standard MNP, except with 10 mg zinc and 6 mg iron                                                                                                                                                                                                                                                                                                                                                                                                                                                                                                                                                     | Daily for 24 weeks                                                           |
| HiZn LoFe Alternating  | Powder             | Same as Standard MNP except with 10 mg zinc, and 6 mg iron and no iron on alternating days                                                                                                                                                                                                                                                                                                                                                                                                                                                                                                                     | Daily for 24 weeks                                                           |
| Zn Tablet Daily        | Dispersible tablet | Zinc (as Zinc Sulfate Monohydrate): 10 mg                                                                                                                                                                                                                                                                                                                                                                                                                                                                                                                                                                      | Daily for 24 weeks                                                           |
| Zn Tablet Intermittent | Dispersible tablet | Zinc: (as Zinc Sulfate Monohydrate): 10 mg                                                                                                                                                                                                                                                                                                                                                                                                                                                                                                                                                                     | Daily for 14 days at baseline and 12 weeks, placebo tablet on all other days |
| Placebo Control        | Powder             | None                                                                                                                                                                                                                                                                                                                                                                                                                                                                                                                                                                                                           | Daily for 24 weeks                                                           |
